# Supplementary material
Source: PubMed Central journal article supplement (PMC7926237)
Supplement: EMBR-22-e51163-s001.pdf [file EMBR-22-e51163-s001.pdf]

## Appendix - Table of Contents

1

2

3

4

**Appendix Table S1. Bacterial strains used in this study. 2**

**Appendix Table S2. Plasmids used in this study. 3**

**Appendix Table S3. Primers used in this study. 4**

5 **Appendix Table S1. Bacterial strains used in this study.**

| <b>Bacterial Strains</b>                       | <b>Source</b>              | <b>Identifier</b> |
|------------------------------------------------|----------------------------|-------------------|
| <i>L. pneumophila</i> (Philadelphia-1)<br>LP02 | (Berger & Isberg,<br>1993) | N/A               |
| <i>L. pneumophila</i> LP03                     | (Berger & Isberg,<br>1993) | N/A               |
| LP02Δ <i>mavQ</i>                              | This study                 | N/A               |
| LP02Δ <i>mavQ</i> (pZL507)                     | This study                 | N/A               |
| LP02Δ <i>mavQ</i> (pMavQ)                      | This study                 | N/A               |
| LP02Δ <i>mavQ</i> (pMavQ <sub>H149A</sub> )    | This study                 | N/A               |
| LP02Δ <i>mavQ</i> Δ <i>lepB</i> (pZL507)       | This study                 | N/A               |
| LP02Δ <i>lepB</i> (pZL507)                     | This study                 | N/A               |
| LP02Δ <i>sidF</i> (pJB908)                     | (Hsu <i>et al</i> , 2012)  | N/A               |
| LP02Δ <i>sidP</i> (pZL507)                     | This study                 | N/A               |
| LP02 (pZL507::SidP)                            | This study                 | N/A               |
| LP03 (pZL507::SidP)                            | This study                 | N/A               |
| LP02Δ <i>legA5</i> (pZL507)                    | This study                 | N/A               |
| <i>E.coli</i> BL21 (DE3)                       | NEB                        | CAT#C2527I        |
| <i>E.coli</i> XL1-Blue                         | Agilent                    | CAT#200249        |

6

7

8 **Appendix Table S2. Plasmids used in this study.**

| <b>Plasmids</b>                          | <b>Source</b>                 | <b>Identifier</b> |
|------------------------------------------|-------------------------------|-------------------|
| pZL507                                   | (Xu <i>et al</i> , 2010)      | N/A               |
| pZL507:: <i>mavQ</i>                     | This study                    | N/A               |
| pZL507:: <i>mavQ</i> <sub>H149A</sub>    | This study                    | N/A               |
| pZL507:: <i>sidP</i>                     | This study                    | N/A               |
| pSR47S                                   | (Merriam <i>et al</i> , 1997) | N/A               |
| pSR47S:: $\Delta$ <i>mavQ</i>            | This study                    | N/A               |
| pSR47S:: $\Delta$ <i>lepB</i>            | This study                    | N/A               |
| pSB157                                   | (Fazzio & Tsukiyama, 2003)    | N/A               |
| pSB157m                                  | This study                    | N/A               |
| pSB157m:: <i>mavQ</i>                    | This study                    | N/A               |
| pSB157m:: <i>mavQ</i> <sub>H149A</sub>   | This study                    | N/A               |
| pSB157m:: <i>mavQ</i> <sub>N152A</sub>   | This study                    | N/A               |
| pSB157m:: <i>mavQ</i> <sub>D160A</sub>   | This study                    | N/A               |
| pcDNA3.1-mCherry                         | Addgene                       | CAT#128744        |
| pcDNA3.1-mCherry:: <i>mavQ</i>           | This study                    | N/A               |
| peGFP::2 $\times$ FYVE <sub>Hrs</sub>    | (Cao <i>et al</i> , 2008)     | N/A               |
| pET28a                                   | Novagen                       | CAT#69864         |
| pET28a:: <i>mavQ</i>                     | This study                    | N/A               |
| pET28a:: <i>mavQ</i> <sub>H149A</sub>    | This study                    | N/A               |
| pET28a:: <i>mavQ</i> <sub>N152A</sub>    | This study                    | N/A               |
| pET28a:: <i>mavQ</i> <sub>D160A</sub>    | This study                    | N/A               |
| pET28a:: <i>lepB</i> _NTD                | This study                    | N/A               |
| pET28a:: <i>mtm</i>                      | This study                    | N/A               |
| pGEX-6P-1                                | GE Healthcare                 | CAT#27-1542-01    |
| pGEX-6P-1:: <i>sidF</i>                  | (Banga <i>et al</i> , 2007)   | N/A               |
| pGEX-6P-1:: <i>sidP</i>                  | This study                    | N/A               |
| pGEX-6P-1:: <i>sidP</i> <sub>R560K</sub> | This study                    | N/A               |
| pCMV-Flag                                | Sigma-Aldrich                 | Cat#C5864         |
| pCMV-4xFlag                              | This study                    | N/A               |
| pCMV-4xFlag:: <i>sidP</i>                | This study                    | N/A               |
| p425GPD                                  | (Mumberg <i>et al</i> , 1995) | N/A               |
| p425GPD:: <i>sidP</i>                    | This study                    | N/A               |
| p425GPD:: <i>sidP</i> <sub>R560K</sub>   | This study                    | N/A               |
| p425GPD:: <i>sidP</i> <sub>664-822</sub> | This study                    | N/A               |

9

10

11 **Appendix Table S3. Primers used in this study.**

| Primers | Sequences <sup>a</sup>                            | Notes                               |
|---------|---------------------------------------------------|-------------------------------------|
| GL801   | ctgAAGCTTATGGGTTTGCCCAAAAAG                       | <i>mavQ</i> 5F HindIII              |
| GL802   | ctgAAGCTTCGATGGGTTTGCCCAAAAAG                     | <i>mavQ</i> 5F HindIII              |
| GL803   | ctgGTCGACTTAGACCACCAAGCTCGT                       | <i>mavQ</i> 3R Sall                 |
| GL804   | ctgGGATCCGCGCGAACGATTTATTTGTGTCCAG                | <i>mavQ</i> knockout<br>up BamHI-F  |
| GL805   | GAATTCAAAGTAGTTTCTTGAAACTGCAGTTGGC<br>TCTCTT      | <i>mavQ</i> knockout<br>up-R        |
| GL806   | AAGAGAGCCAACTGCAGTTTCAAGAACTACTTT<br>GAATTC       | <i>mavQ</i> knockout<br>down-F      |
| GL807   | ctgGAGCTCTATAATCTTGTCCAAAAACTGCTCA                | <i>mavQ</i> knockout<br>down SacI-R |
| GL808   | TTAGATTATGCGGGGCACCATCATCATCAAG<br>AAACCACCT      | <i>mavQ</i> <sub>H149A</sub> -1     |
| GL809   | AGGTGGTTTCTTGATGATGATGATGGTGCCCG<br>CATAATCTAA    | <i>mavQ</i> <sub>H149A</sub> -2     |
| GL810   | CCCGGCCAAACTTAGAGCATGCGGGTGACCATC<br>ATCAT        | <i>mavQ</i> <sub>N152A</sub> -1     |
| GL811   | ATGATGATGGTCACCCGCATGCTCTAAGTTTGGC<br>CGGG        | <i>mavQ</i> <sub>N152A</sub> -2     |
| GL812   | ACCAATAAAAAACATATCAAAGCAATATCCCG<br>GCCAAACTTAG   | <i>mavQ</i> <sub>D160A</sub> -1     |
| GL813   | CTAAGTTTGGCCGGGATATTGCTTTTGATATGTT<br>TTTTTATTGGT | <i>mavQ</i> <sub>D160A</sub> -2     |
| GL814   | ctgGGATCCATGGCTTCTGCATCAACTTC                     | <i>mtm</i> 5F BamHI                 |
| GL815   | ctgGTCGACTCAGAAGTGAGTTTGCACATG                    | <i>mtm</i> 3R Sall                  |
| GL816   | ctgGGATCCATGTTAATTTATCAAGG                        | <i>lepB_NTD</i> 5F<br>BamHI         |
| GL817   | ctgGTCGACTTAGGACATATCTTTAAG                       | <i>lepB_NTD</i> 3R<br>Sall          |
| GL818   | ctgGGATCCATGCACAACTTCAGGCTG                       | <i>lepB</i> knockout<br>up BamHI-F  |
| GL819   | GTGAGTGGAGGAAATCGCTTTTTTTCTTTAAAT<br>CGAACTATTTT  | <i>lepB</i> knockout<br>up-R        |
| GL820   | GAAATAGTTTCGATTTAAAGAAAAAAGCGATTTT<br>CTCCACTCAC  | <i>lepB</i> knockout<br>down-F      |
| GL821   | ctgGTCGACGTGATCTTGATAATTAATTTG                    | <i>lepB</i> knockout<br>down Sall-R |

|       |                                                             |                                            |
|-------|-------------------------------------------------------------|--------------------------------------------|
| GL822 | ctg <u>GGATCC</u> ATGGGAAAAGGTATAATTTTAC                    | <i>sidP</i> 5F BamHI                       |
| GL823 | ctg <u>CTCGAG</u> TTACACATAAACCAAGCCAC                      | <i>sidP</i> 3R XhoI                        |
| GL824 | ctg <u>GGATCC</u> ATGAGCAAGGATTTGCGTTC                      | <i>sidP</i> <sub>664-822</sub><br>5F BamHI |
| GL825 | <u>GCAATAACTCTACTGCTTTTTTGTCTTTACCACTG</u><br><u>ACACAG</u> | <i>sidP</i> <sub>R560K</sub> 5'            |
| GL826 | <u>CTGTGTCAGTGGTAAAGACAAAAAAGCAGTAGA</u><br><u>GTTATTGC</u> | <i>sidP</i> <sub>R560K</sub> 3'            |

12 <sup>a</sup> Restriction enzyme sites are underlined.

13

14

## 15 References

16 Banga S, Gao P, Shen X, Fiscus V, Zong WX, Chen L, Luo ZQ (2007) Legionella  
17 pneumophila inhibits macrophage apoptosis by targeting pro-death members of the Bcl2  
18 protein family. *Proc Natl Acad Sci U S A* 104: 5121-5126

19 Berger KH, Isberg RR (1993) Two distinct defects in intracellular growth complemented by  
20 a single genetic locus in Legionella pneumophila. *Mol Microbiol* 7: 7-19

21 Cao CH, Backer JM, Laporte J, Bedrick EJ, Wandinger-Ness A (2008) Sequential actions  
22 of myotubularin lipid phosphatases regulate endosomal PI(3)P and growth factor receptor  
23 trafficking. *Mol Biol Cell* 19: 3334-3346

24 Fazzio TG, Tsukiyama T (2003) Chromatin remodeling in vivo: evidence for a nucleosome  
25 sliding mechanism. *Mol Cell* 12: 1333-1340

26 Hsu F, Zhu W, Brennan L, Tao L, Luo ZQ, Mao Y (2012) Structural basis for substrate  
27 recognition by a unique Legionella phosphoinositide phosphatase. *Proc Natl Acad Sci U S*  
28 *A* 109: 13567-13572

29 Merriam JJ, Mathur R, Maxfield-Boumil R, Isberg RR (1997) Analysis of the Legionella  
30 pneumophila flil gene: intracellular growth of a defined mutant defective for flagellum  
31 biosynthesis. *Infect Immun* 65: 2497-2501

32 Mumberg D, Muller R, Funk M (1995) Yeast vectors for the controlled expression of  
33 heterologous proteins in different genetic backgrounds. *Gene* 156: 119-122

34 Xu L, Shen X, Bryan A, Banga S, Swanson MS, Luo ZQ (2010) Inhibition of host vacuolar  
35 H<sup>+</sup>-ATPase activity by a Legionella pneumophila effector. *Plos Pathog* 6: e1000822

36
