# Supplementary material
Source: PubMed Central journal article supplement (PMC7926237)

For Fig. 2C

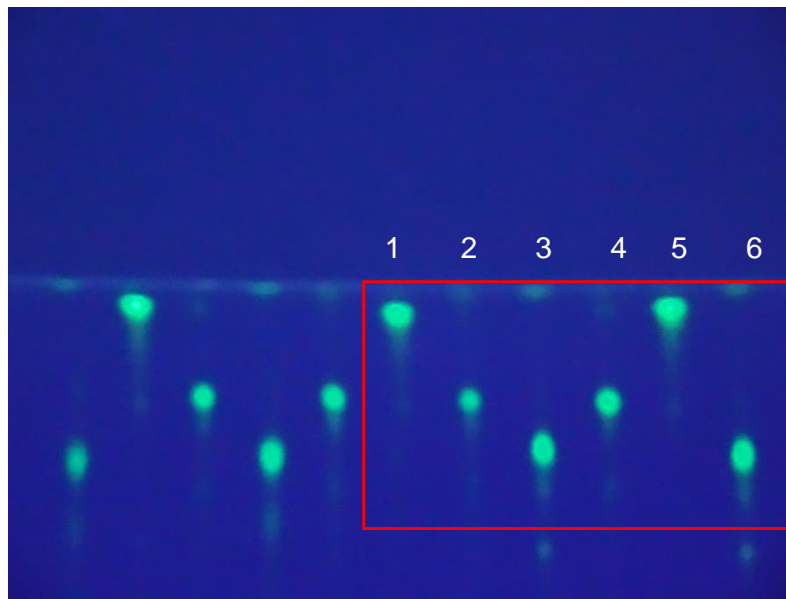

For Fig. 2D

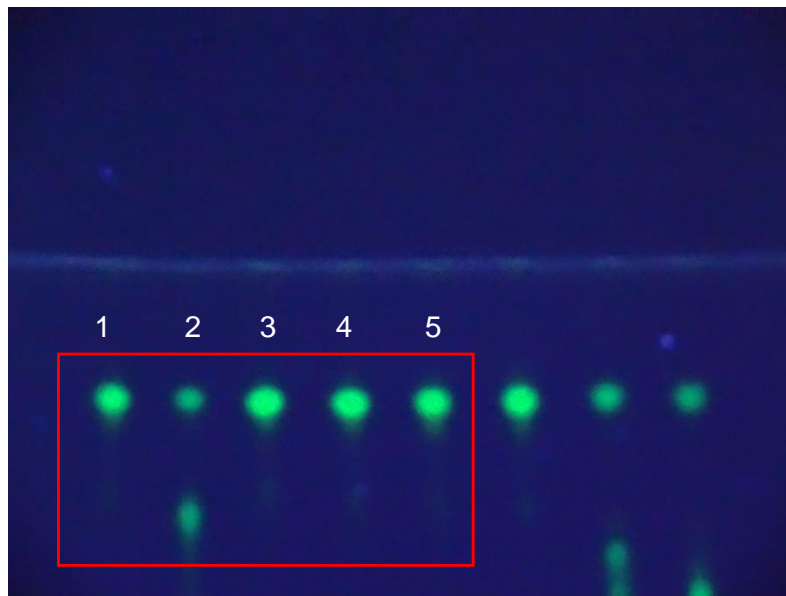

Supplement: EMBR-22-e51163-s004.pdf [file EMBR-22-e51163-s004.pdf]

For Fig. 3D

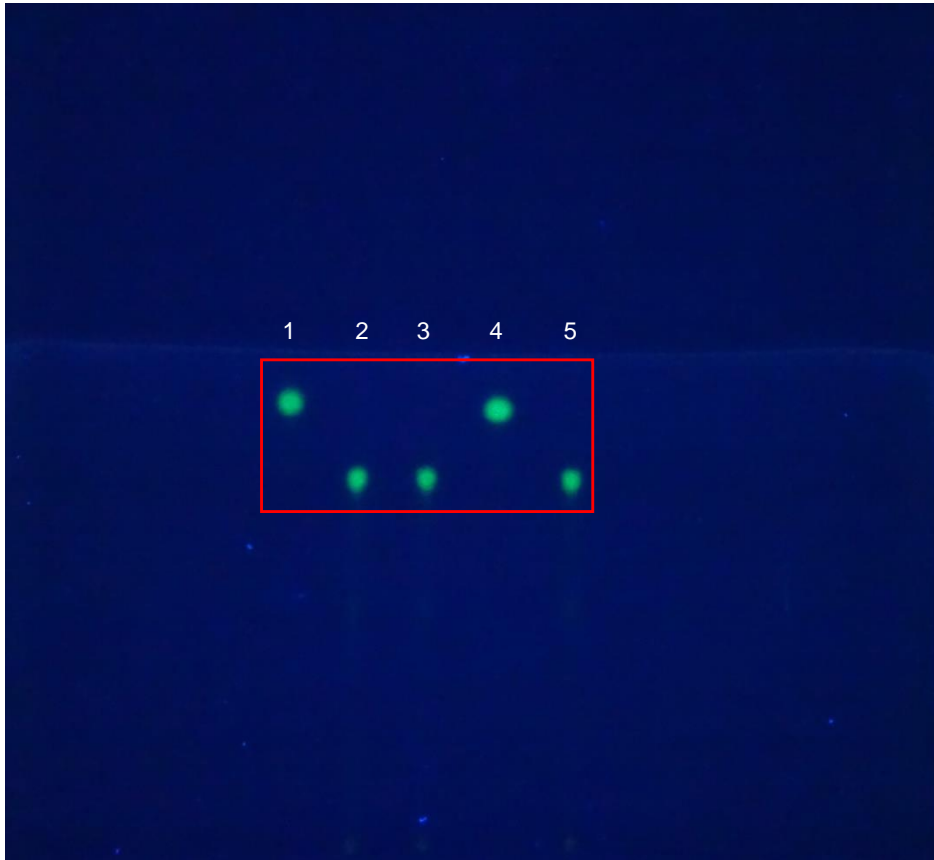

Supplement: EMBR-22-e51163-s005.pdf [file EMBR-22-e51163-s005.pdf]

For Fig. 4E

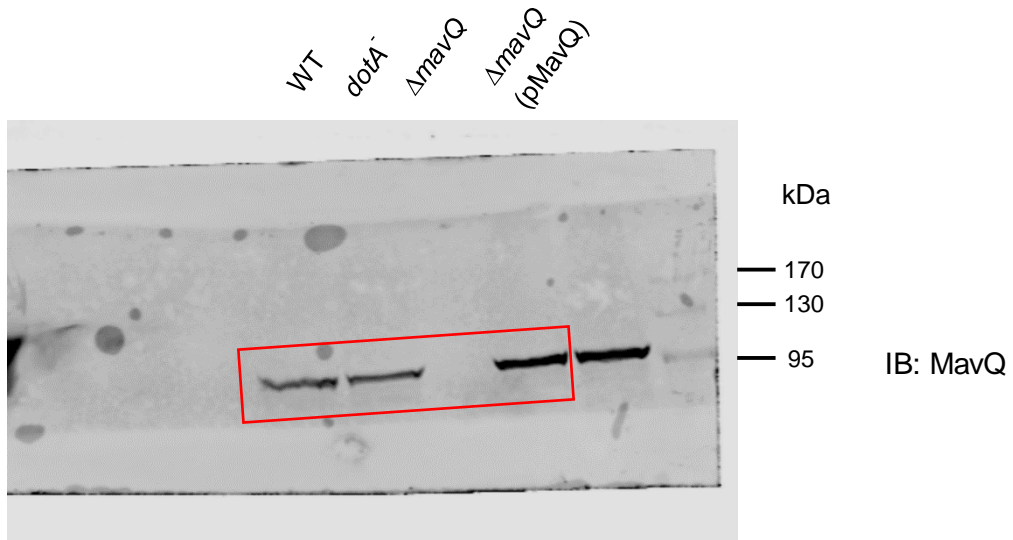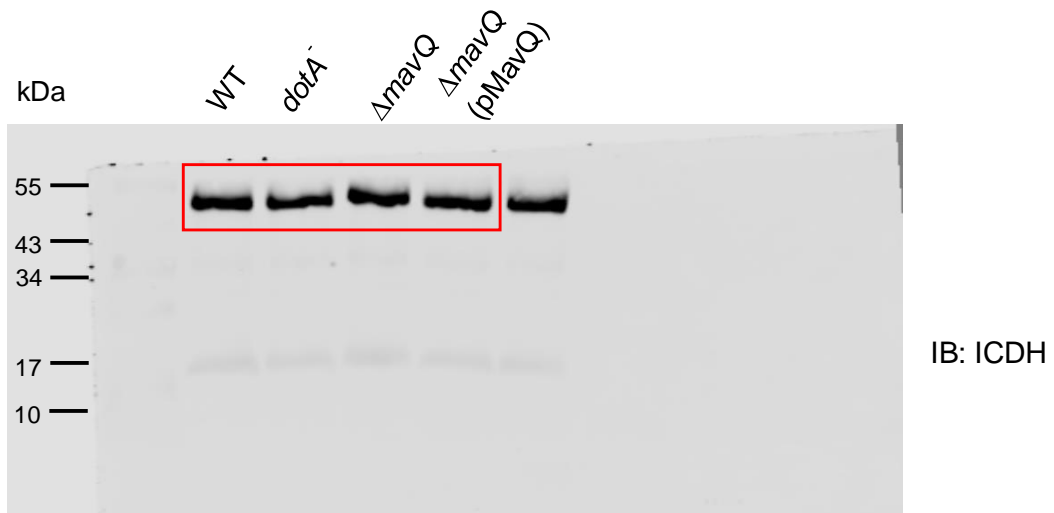

Supplement: EMBR-22-e51163-s006.pdf [file EMBR-22-e51163-s006.pdf]

For Fig. 5A

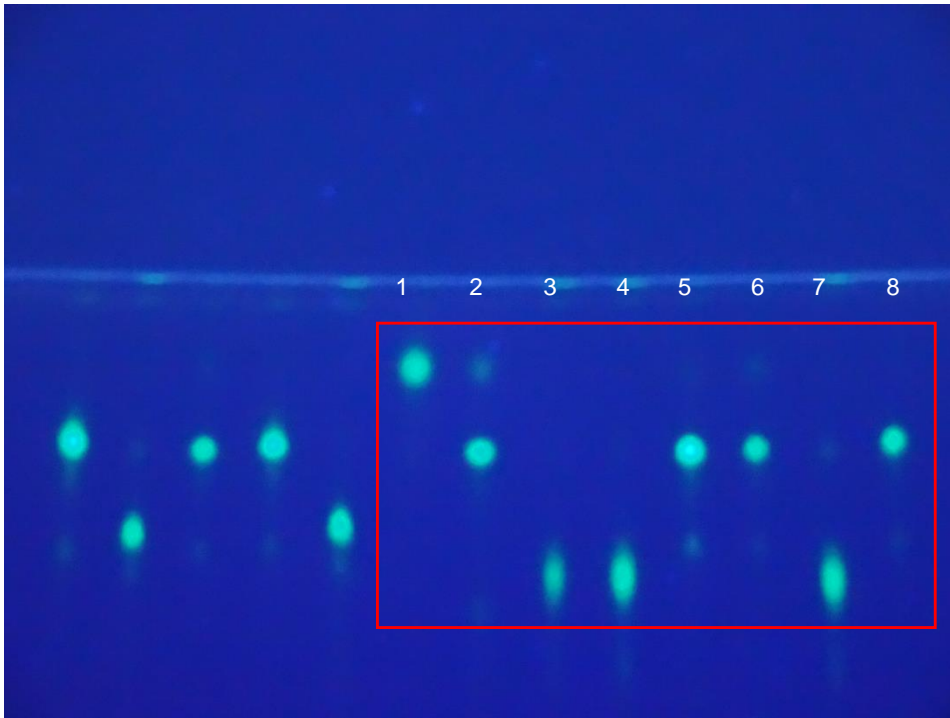

For Fig. 5D

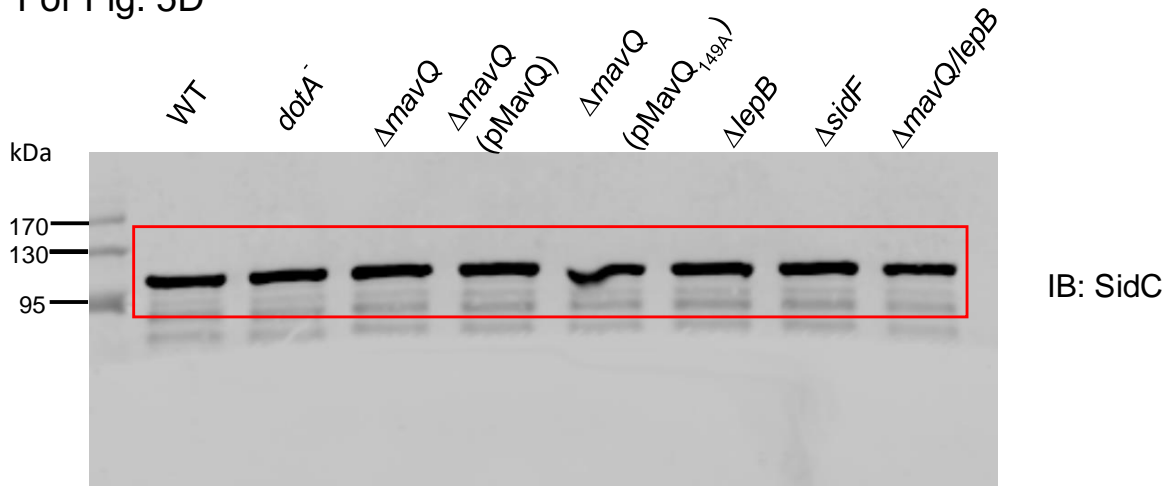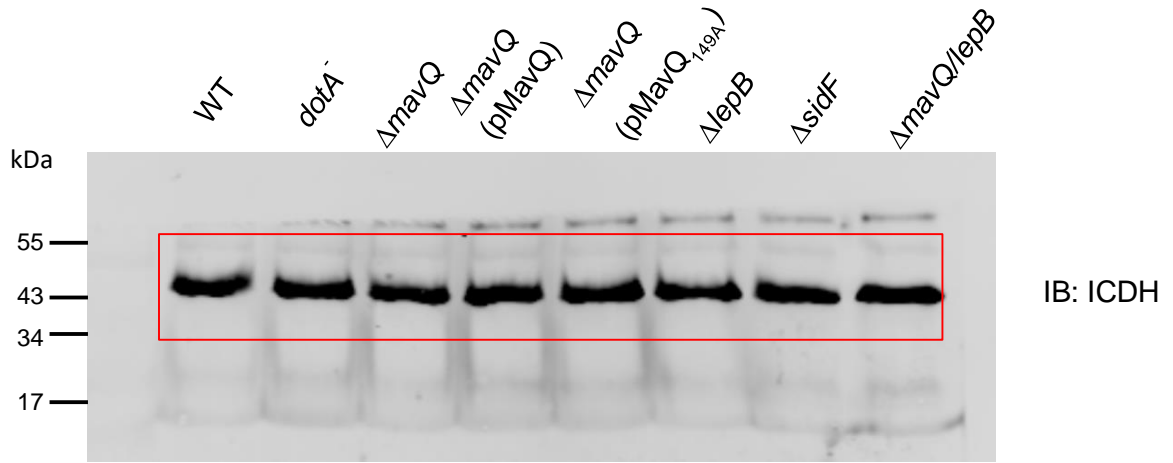

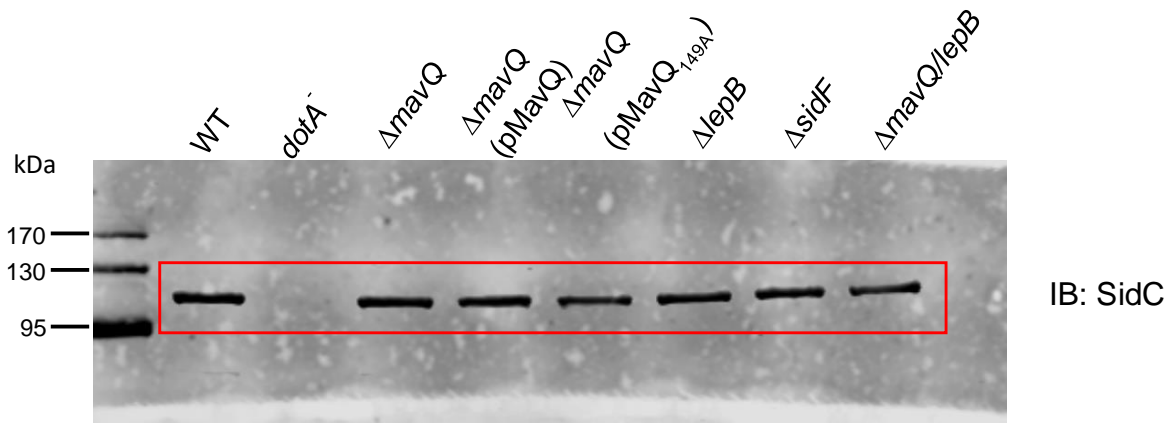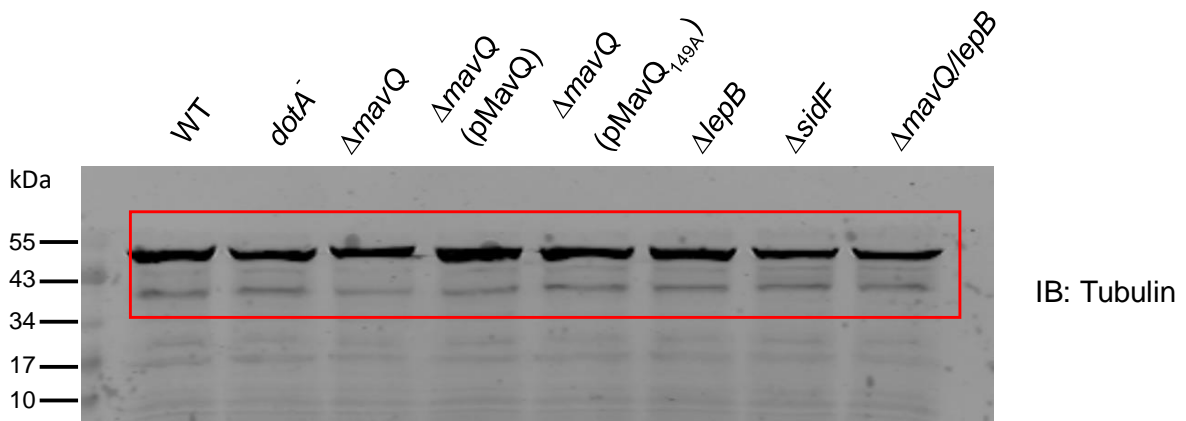

Supplement: EMBR-22-e51163-s007.pdf [file EMBR-22-e51163-s007.pdf]

For Fig. 6C

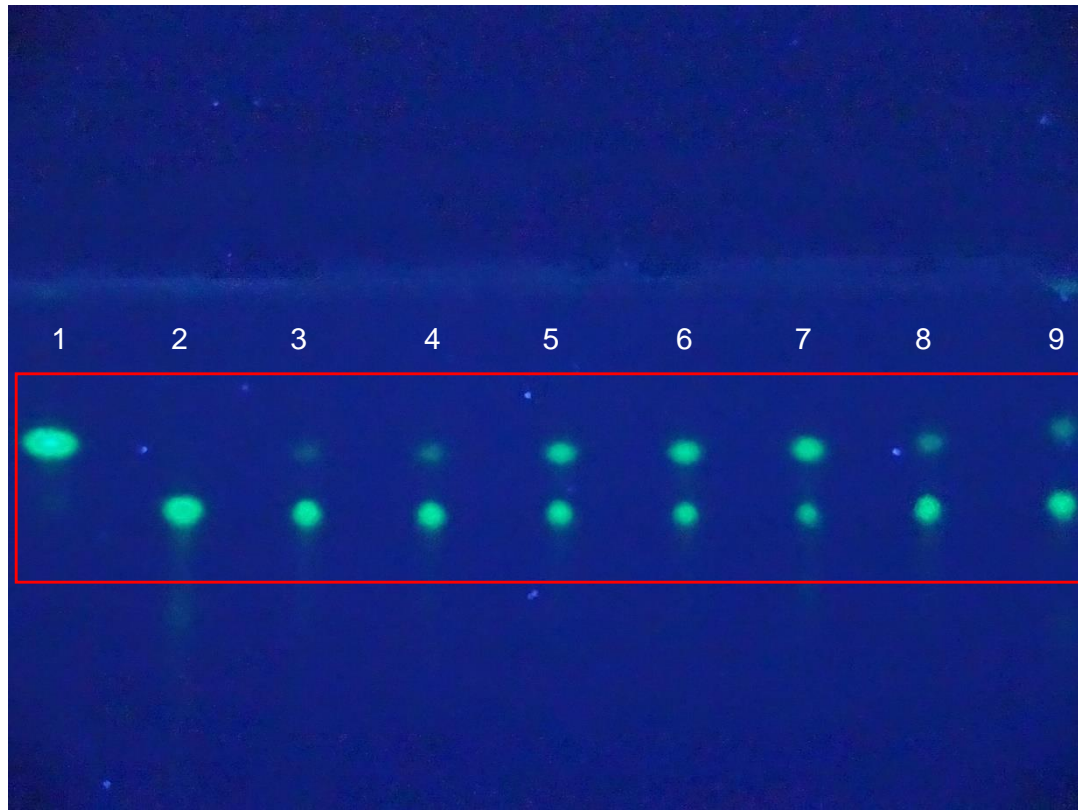

For Fig. 6D

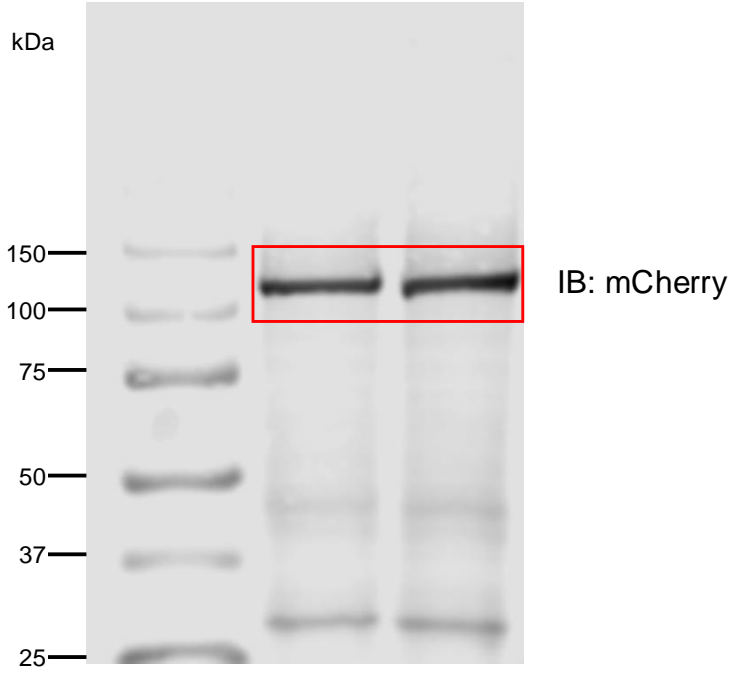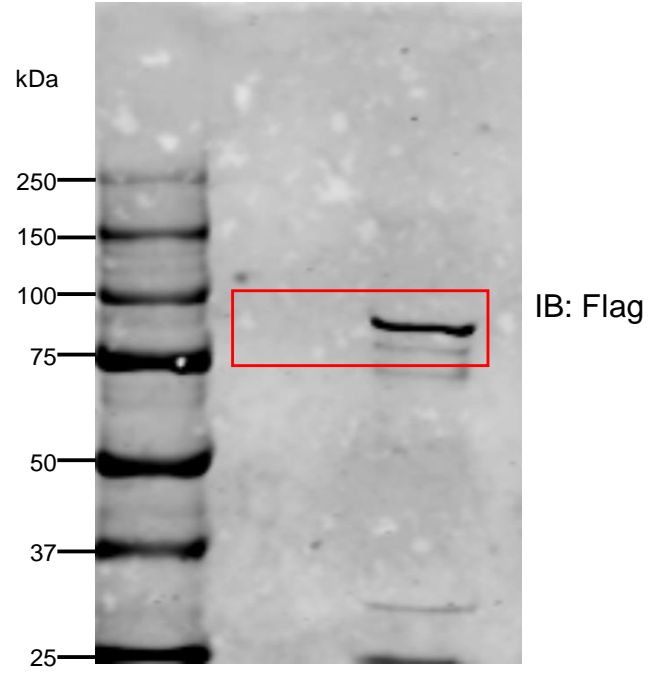

Supplement: EMBR-22-e51163-s008.pdf [file EMBR-22-e51163-s008.pdf]
